# Supplementary material for: Single-Cell Profiling of Coding and Noncoding Genes in Human Dopamine Neuron Differentiation
Source: MDPI journal article supplement (doi:10.3390/cells10010137), 2021-01-12
Supplement: s1 [file s1]

## Supplementary Material

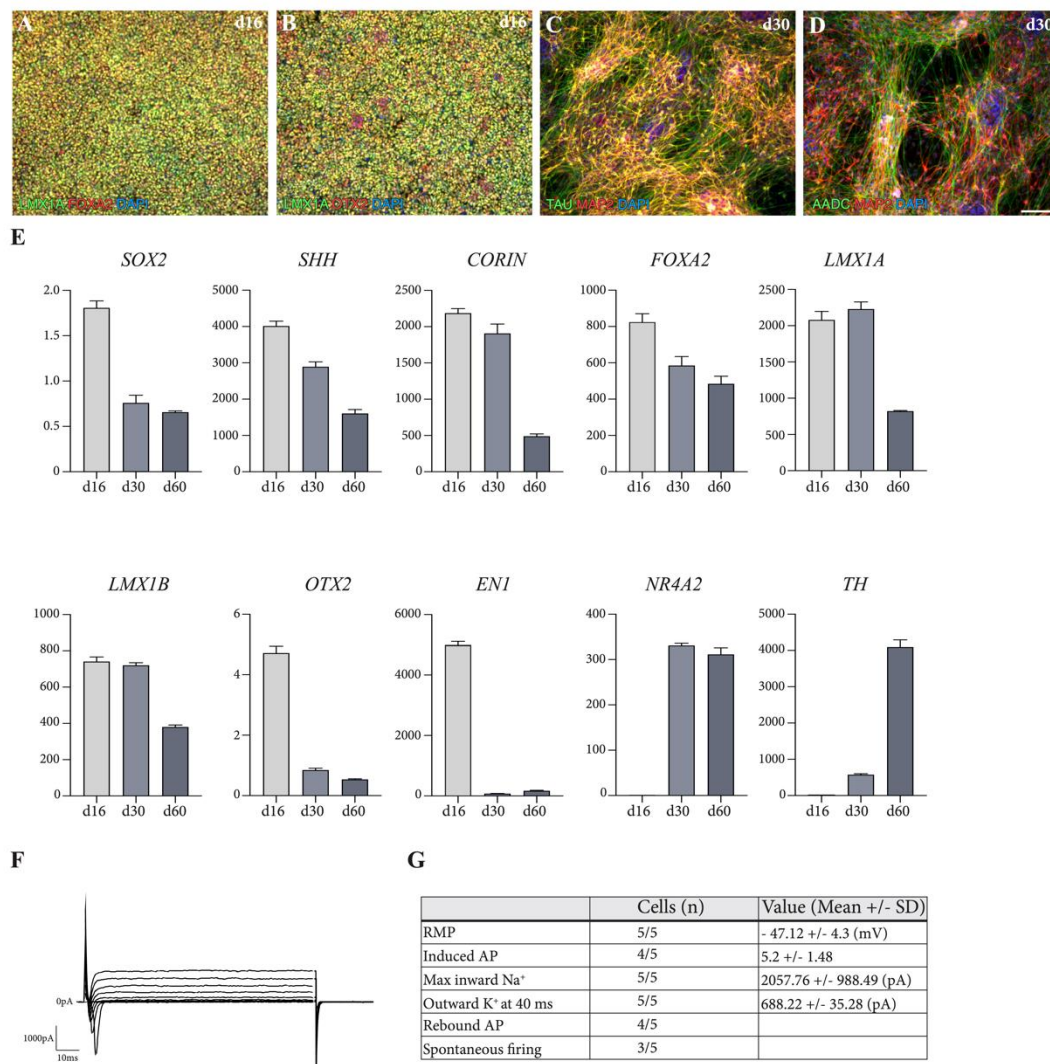

**Figure S1.** **A**, Immunofluorescence staining of floor plate markers LMX1A/OTX2, **B**, LMX1A/FOXA2 at day 16, **C**, of neuronal markers TAU/MAP2, **D**, and AADC/MAP2 at day 30. Scale bars, 100  $\mu$ m. Nuclei were stained with DAPI. **E**, RT-qPCR analysis of selected VM markers during hPSC DA neuron differentiation. Values are given as fold change relative to undifferentiated hPSCs. **F**, Representative trace of inward  $\text{Na}^+$  and outward  $\text{K}^+$  currents measured by whole-cell patch-clamp recordings of VM-patterned hPSCs at day 60. **G**, Table showing the electrophysiological properties of patched neurons ( $n = 5$ ) at day 60. Resting membrane potential (RMP), induced action potentials (AP), maximum inward sodium ( $\text{Na}^+$ ), outward potassium ( $\text{K}^+$ ) currents measured at 40 ms are indicated as mean value with standard deviation (SD). Rebound AP and Spontaneous Firing are reported as fraction of cells that displayed these characteristics.

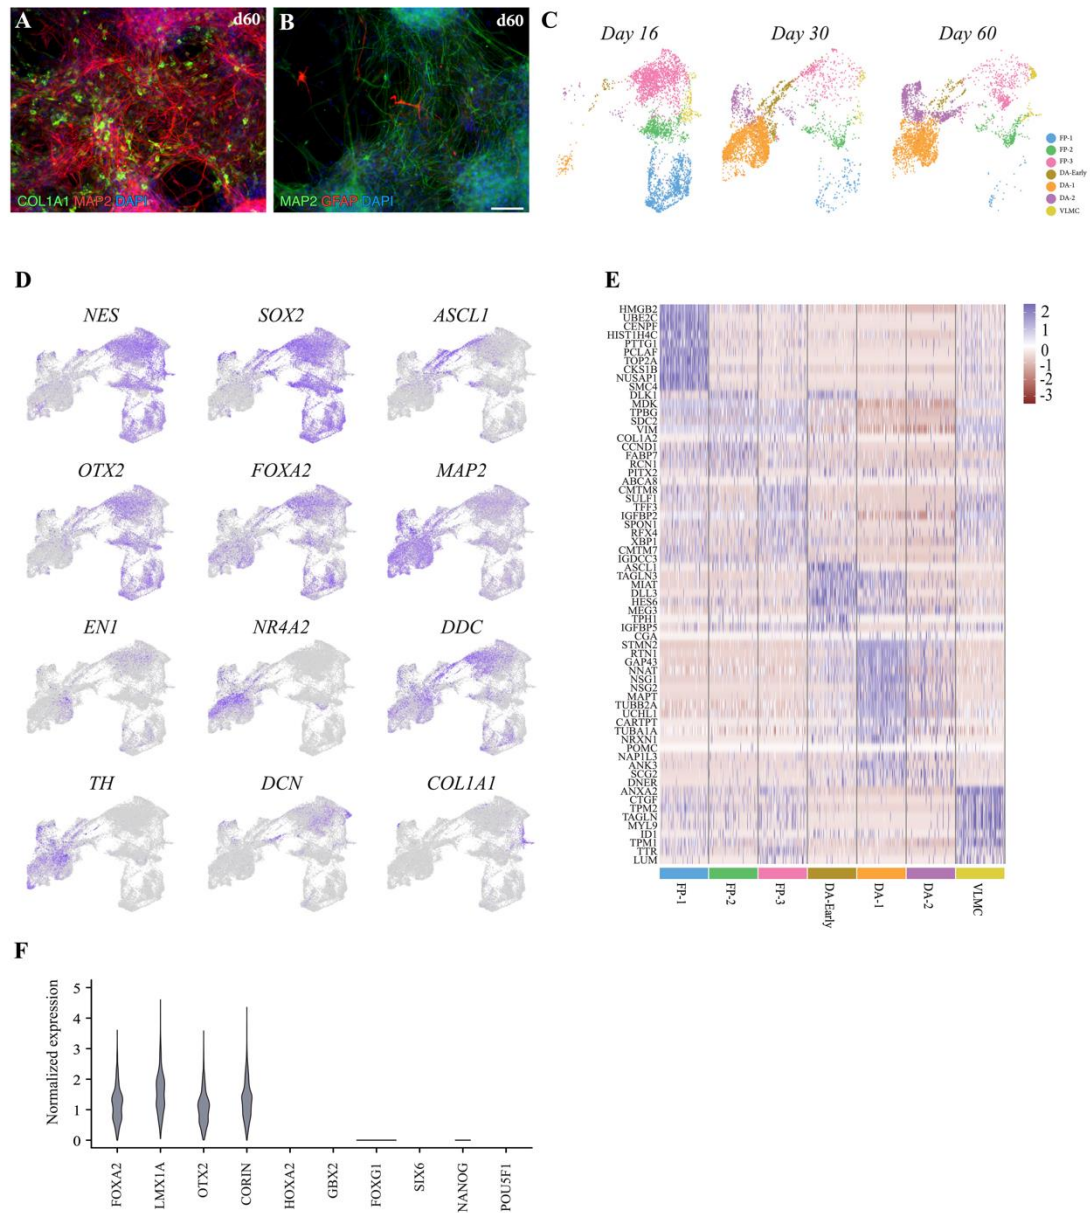

**Figure S2.** **A**, Immunofluorescence staining of MAP2/Collagen1A1 and **B**, MAP2/GFAP as VLMC and glial markers, respectively. Scale bars, 100  $\mu$ m. Nuclei were stained with DAPI. **C**, Individual UMAP plots showing VM culture composition at day 16, 30, and 60. **D**, Feature plots showing expression of selected genes across identified cell clusters. Expression is indicated as a blue dot. **E**, Heat map showing differentially expressed genes across identified cell clusters. Values are given as standard deviations relative to average expression. **F**, Violin plot with normalized expression of pluripotent forebrain- and hindbrain-associated genes at day 16 of VM differentiation.

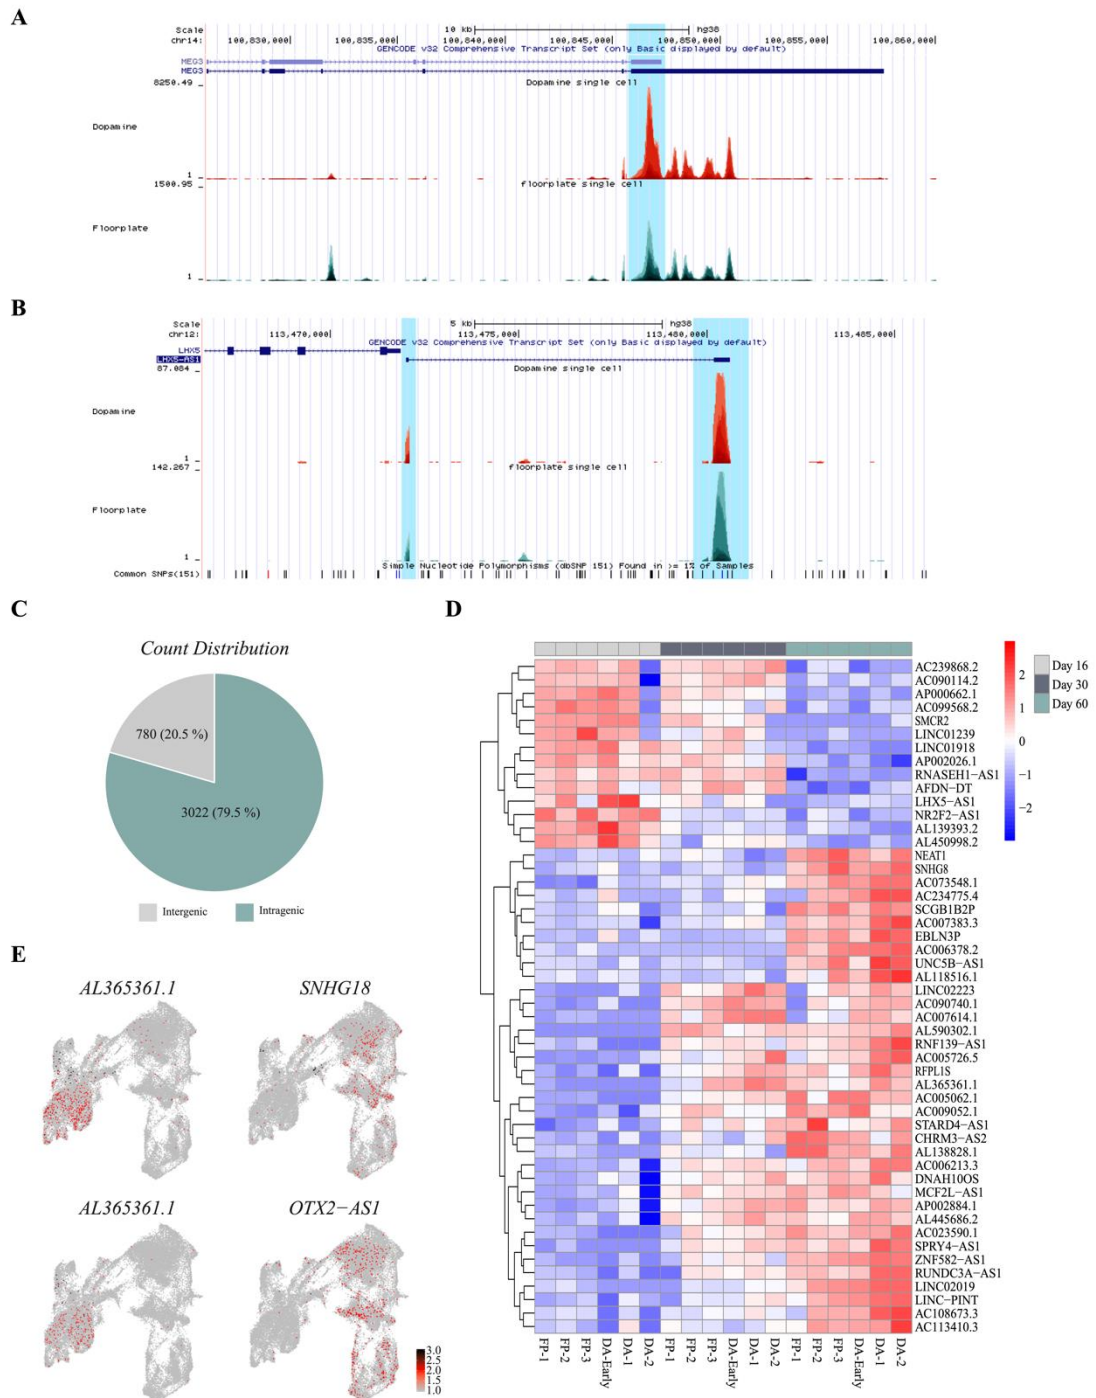

**Figure S3.** **A**, Differentially expressed lncRNAs *MEG3* and **B**, *LHX5-AS1*, candidates in UCSC Genome Browser tracks (DA, red; floor plate, green). **C**, Genomic distribution of expressed lncRNAs (+/- 5kb). **D**, Expression heatmap of the top 50 most differentially expressed lncRNAs across differentiation time points ( $p$  adj <0.01, log2 vst). **E**, Expression map of candidate lncRNAs projected on UMAP plot.

**Table S1.** Sequence of qPCR primers=

| Gene Name | Primer Sequence (fwd/rev)                    |
|-----------|----------------------------------------------|
| ACTB      | CCTTGCACATGCCCGAG<br>GCACAGAGCCTCGCCTT       |
| GAPDH     | TTGAGGTCAATGAAGGGGTC<br>GAAGGTGAAGGTCGGAGTCA |
| SOX2      | CATGGCAATCAAAATGTCCA<br>TTTCACGTTTGCAACTGTCC |

---

|       |                        |
|-------|------------------------|
| CORIN | CATATCTCCATCGCCTCAGTTG |
|       | GGCAGGAGTCCATGACTGT    |
| FOXA2 | CCGTTCTCCATCAACAACCT   |
|       | GGGGTAGTGCATCACCTGTT   |
| LMX1A | CGCATCGTTTCTTCTCCTCT   |
|       | CAGACAGACTTGGGGCTCAC   |
| LMX1B | CTTAACCAGCCTCAGCGACT   |
|       | TCAGGAGGCGAAGTAGGAAC   |
| OTX2  | ACAAGTGGCCAATTCACTCC   |
|       | GAGGTGGACAAGGGATCTGA   |
| EN1   | CGTGGCTTACTCCCCATTTA   |
|       | TCTCGCTGTCTCTCCCTCTC   |
| NR4A2 | CAGGCGTTTTTCGAGGAAAT   |
|       | GAGACGCGGAGAACTCCTAA   |
| TH    | CGGGCTTCTCGGACCAGGTGTA |
|       | CTCCTCGGCGGTGTACTCCACA |

---

**Table S2.**

LncRNAs deregulated in 60 *vs* 16 time points

**Table S3.**

LncRNAs deregulated in DA *vs* FP cell-types
