# Supplementary material for: Single-Cell Profiling of Coding and Noncoding Genes in Human Dopamine Neuron Differentiation
Source: Cells. 2021 Jan 12;10(1):137. doi: 10.3390/cells10010137 (PMC7827700; doi:10.3390/cells10010137)
Supplement: Supplementary file 1 [file cells-10-00137-s001.zip]

Archive with 4 entries (4 files):
- cells-1061308 for conversion sm.docx
- cells-1061308 for conversion sm.pdf
- Table 2_Top_significant_day60Vs16(reference)Pval_0.01 copy.xlsx
- Table 3_Top_significant0.01_Cell_dopvsFloorplate(reference) copy.xlsx
